### Adaptation of "DePuy" Abduction Bar and Clamp

Dr. Raymond G. Martin of Salem, Oregon, describes an adaptation of a "DePuy" abduction bar and clamp which is fastened to the standard Fluotec vaporizer with a U-clamp. The device is intended to facilitate the securing of the Fluotec to an upright rod, found on most anesthesia machines.

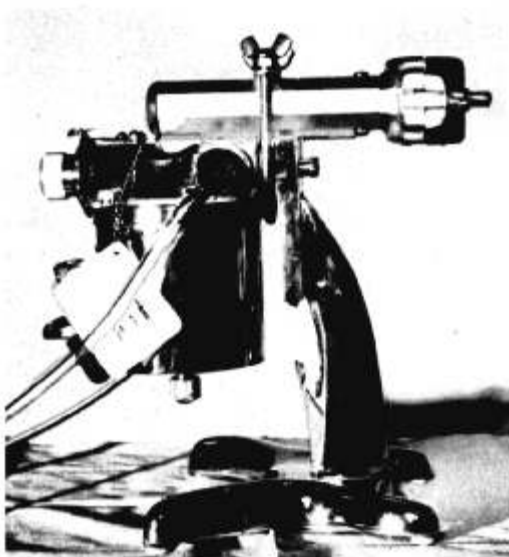

The materials needed for the adaptation shown in the illustrations are: DePuy abduction bar with clamp, #654G-9; U-clamp, 4 by 2 inches, with plate and nuts, and a leather strip, about  $\frac{1}{2}$ -inch wide,  $\frac{1}{8}$ -inch thick, and 5 inches long.

The leather is fastened to the six internal faces of the clamp with contact cement; the remainder is fastened to the bottom of the bar where the Fluotec will be attached. The U-clamp goes under the bolts holding the Fluotec and is fastened to the bar by the plate and nuts. The cost of the clamp and all material is less than eight dollars.

The bar is closed with a rubber stopper. If a  $\frac{1}{2}$ -inch hole is drilled through the stopper and a single slit put in the stopper so that it will fit on a  $\frac{1}{2}$ -inch rod, the clamp can be attached to the stopper to provide a firm support. The bar and clamp can be used to support other anesthesia devices, such as the infant absorber.

We have used this holder at our hospital for a year and found it satisfactory. It has also been used at the University of Oregon in Portland; and at Children's Orthopedic Hospital in Seattle, one of the clamps has been employed to fasten the Fluotec to machines, intravenous stands, and even the portable anesthesia tables.

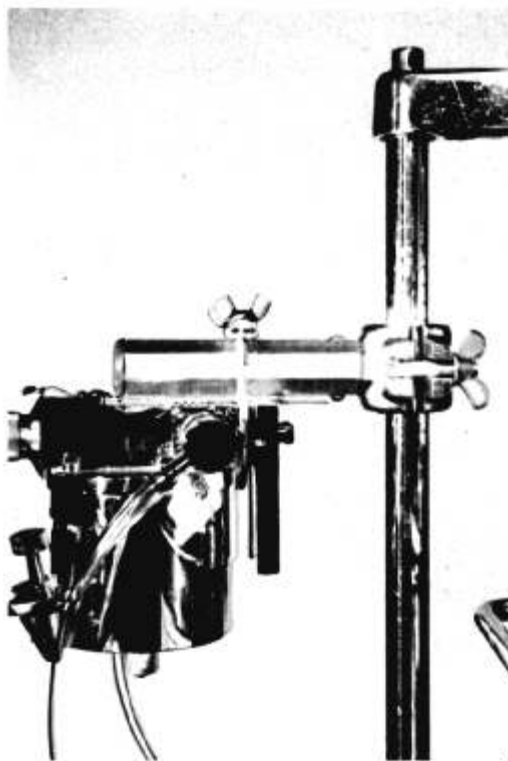

Source: https://asa2.silverchair.com/anesthesiology/article-pdf/24/1/117/281811/0000542-196301000-00022.pdf
